# Supplementary material for: Experimental Study of Body-Fin Interaction and Vortex Dynamics Generated by a Two Degree-Of-Freedom Fish Model
Source: MDPI journal article supplement (doi:10.3390/biomimetics4040067), 2019-10-08
Supplement: s1 [file s1]

# Supplementary Materials: Experimental Study of Body-Fin Interaction and Vortex Dynamics Generated by a Two Degree-of-Freedom Fish Model

S.A. Brooks<sup>1,\*</sup> and M.A. Green<sup>1</sup>

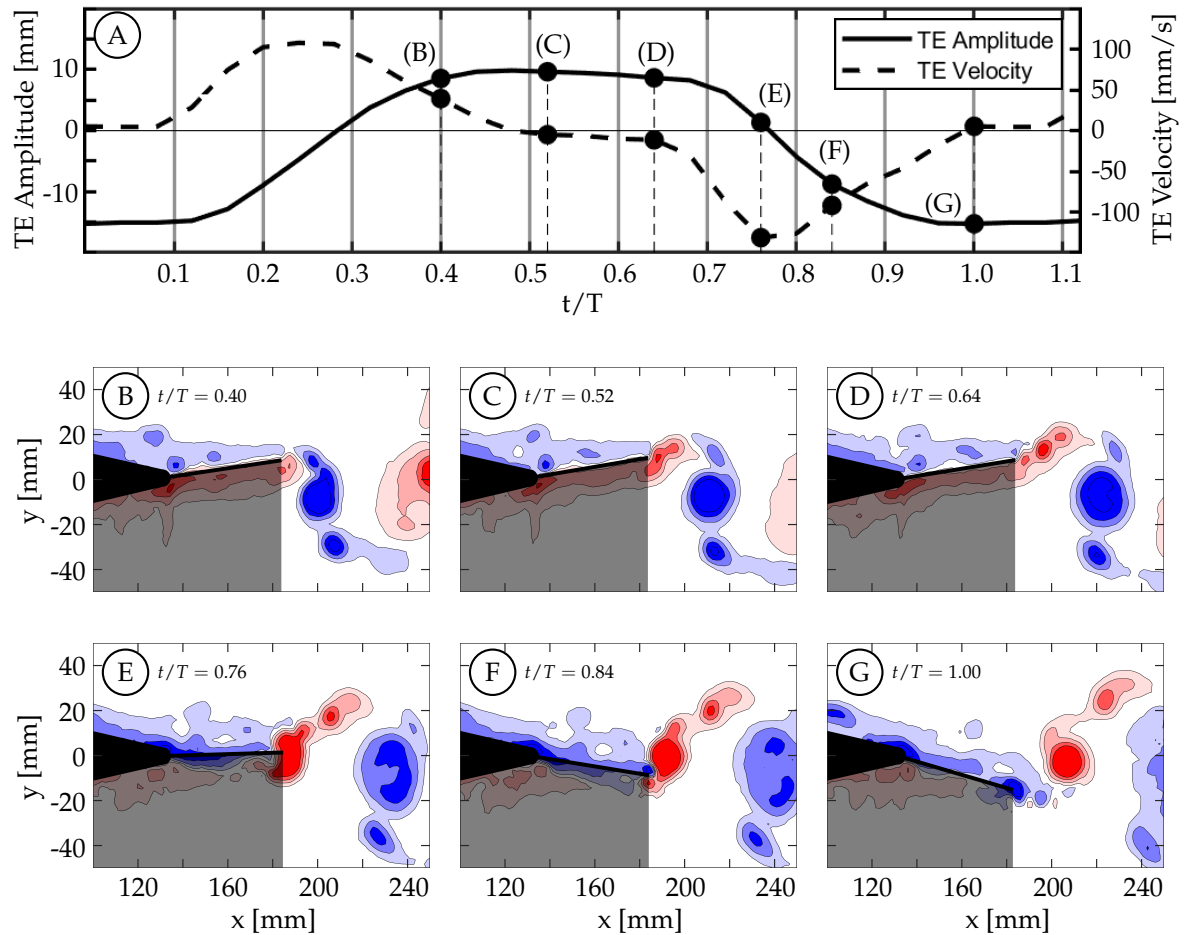

**Figure S1.** (Case 1: SG1, KG1) Spanwise vorticity ( $\omega_z = \pm[1, 4, 9, 16]s^{-1}$ ) contours are shown here for case 1 which has  $\theta_{T,o} = 0.24^\circ$ ,  $\theta_{C,o} = 12.90^\circ$ , and  $St = 0.308$ . Positive spanwise vorticity is shown in red and negative in blue: (A) The trailing edge motion profile where the solid curve represents the trailing edge amplitude and the dashed curve represents the trailing edge velocity. (B)  $t/T = 0.40$ . (C)  $t/T = 0.52$ . (D)  $t/T = 0.64$ . (E)  $t/T = 0.76$ . (F)  $t/T = 0.84$ . (G)  $t/T = 1.00$ .

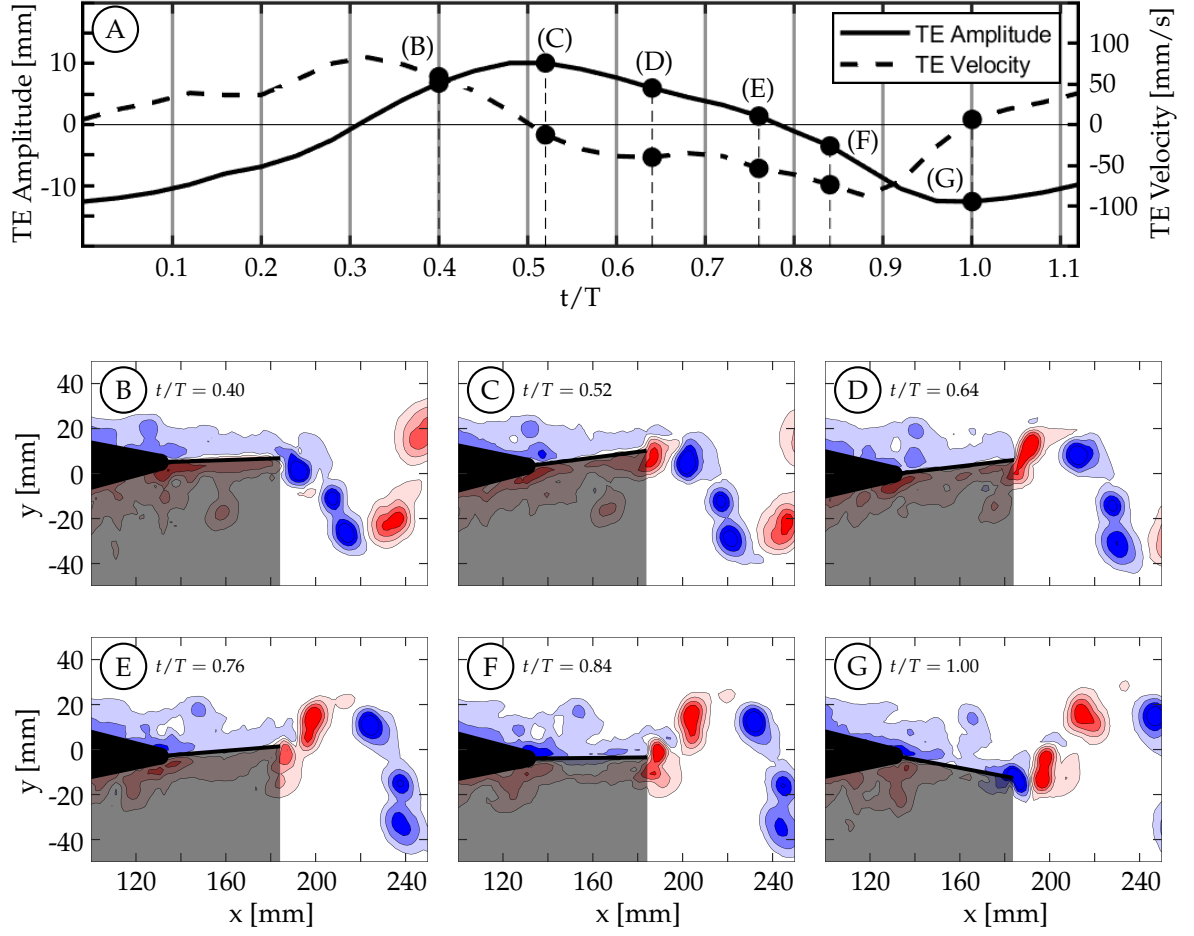

**Figure S2.** (Case 2: SG1, KG2) Spanwise vorticity ( $\omega_z = \pm[1, 4, 9, 16]s^{-1}$ ) contours are shown here for case 2 which has  $\theta_{T,\rho} = 2.01^\circ$ ,  $\theta_{C,\rho} = 9.03^\circ$ , and  $St = 0.279$ . Positive spanwise vorticity is shown in red and negative in blue: (A) The trailing edge motion profile where the solid curve represents the trailing edge amplitude and the dashed curve represents the trailing edge velocity. (B)  $t/T = 0.40$ . (C)  $t/T = 0.52$ . (D)  $t/T = 0.64$ . (E)  $t/T = 0.76$ . (F)  $t/T = 0.84$ . (G)  $t/T = 1.00$ .

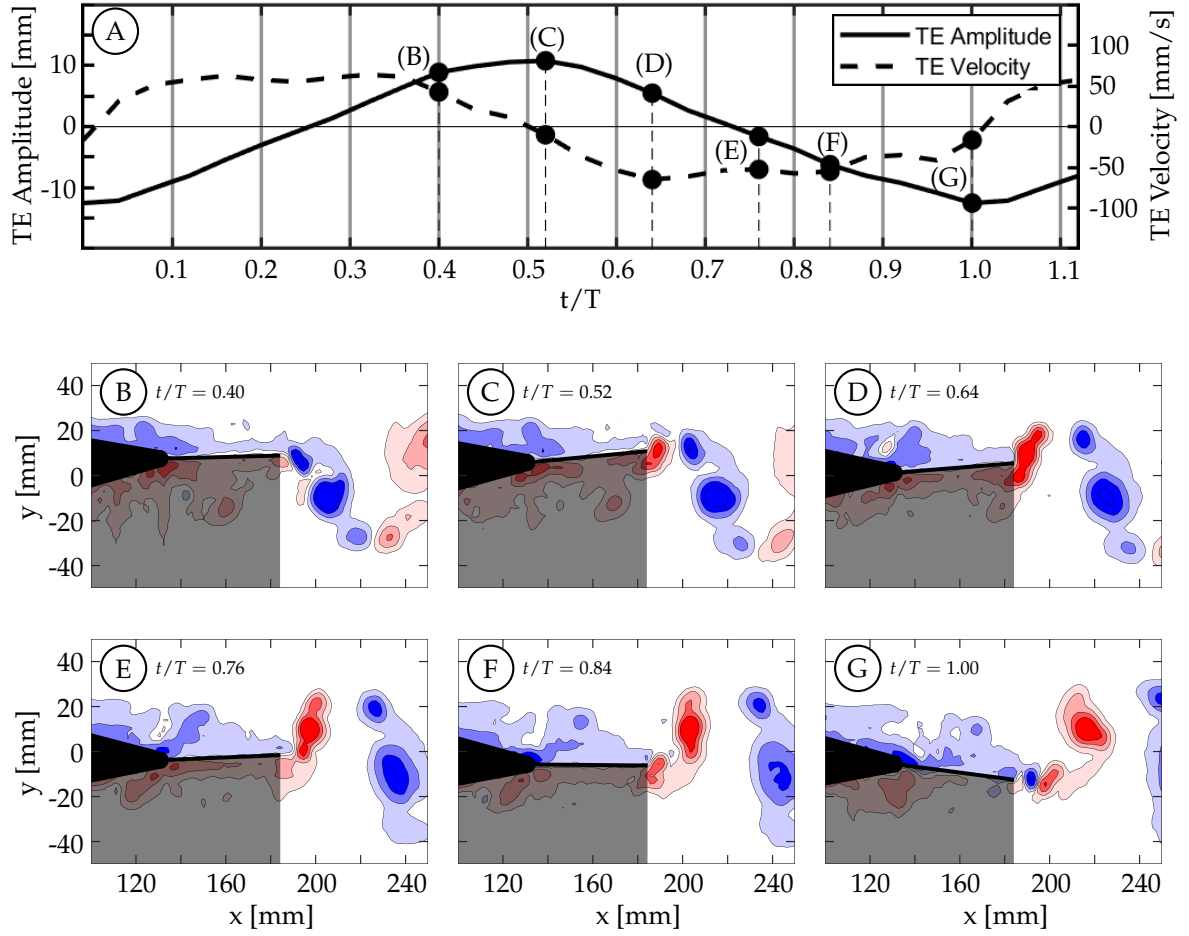

**Figure S3.** (Case 3: SG1, KG3) Spanwise vorticity ( $\omega_z = \pm[1, 4, 9, 16]s^{-1}$ ) contours are shown here for case 3 which has  $\theta_{T,\rho} = 3.08^\circ$ ,  $\theta_{C,\rho} = 5.48^\circ$ , and  $St = 0.286$ . Positive spanwise vorticity is shown in red and negative in blue: (A) The trailing edge motion profile where the solid curve represents the trailing edge amplitude and the dashed curve represents the trailing edge velocity. (B)  $t/T = 0.40$ . (C)  $t/T = 0.52$ . (D)  $t/T = 0.64$ . (E)  $t/T = 0.76$ . (F)  $t/T = 0.84$ . (G)  $t/T = 1.00$ .

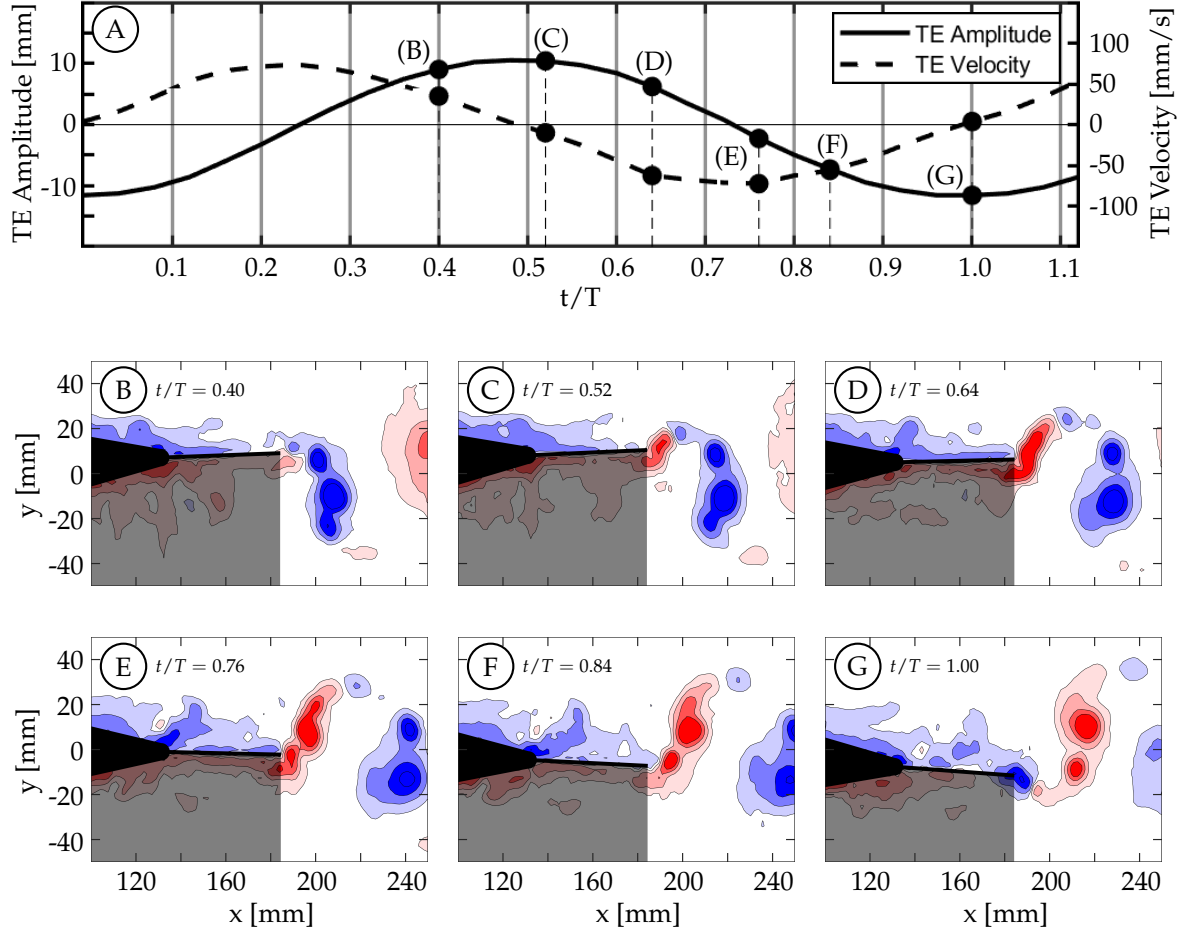

**Figure S4.** (Case 4: SG1, KG4) Spanwise vorticity ( $\omega_z = \pm[1, 4, 9, 16]s^{-1}$ ) contours are shown here for case 4 which has  $\theta_{T,\rho} = 3.44^\circ$ ,  $\theta_{C,\rho} = 0.18^\circ$ , and  $St = 0.271$ . Positive spanwise vorticity is shown in red and negative in blue: (A) The trailing edge motion profile where the solid curve represents the trailing edge amplitude and the dashed curve represents the trailing edge velocity. (B)  $t/T = 0.40$ . (C)  $t/T = 0.52$ . (D)  $t/T = 0.64$ . (E)  $t/T = 0.76$ . (F)  $t/T = 0.84$ . (G)  $t/T = 1.00$ .



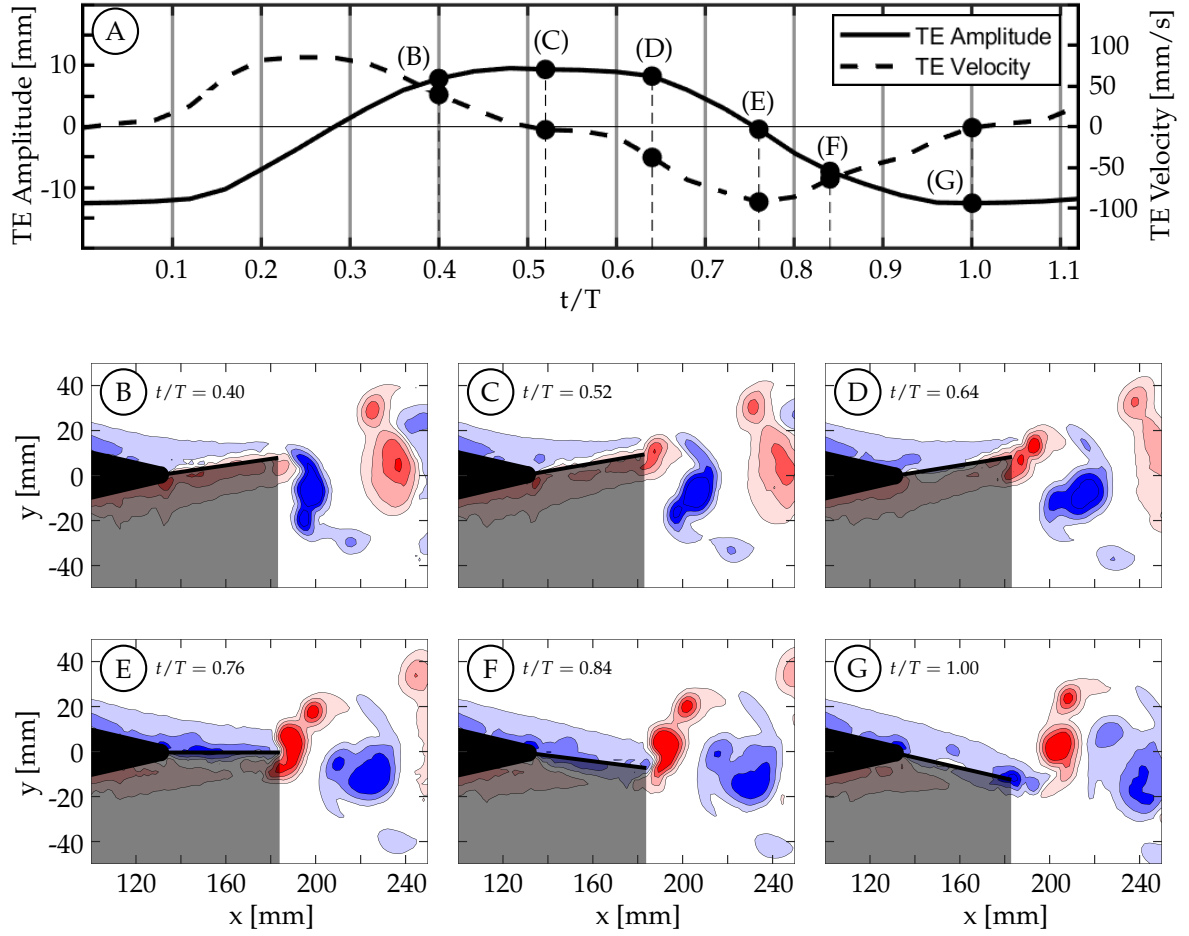

**Figure S5.** (Case 5: SG2, KG1) Spanwise vorticity ( $\omega_z = \pm[1, 4, 9, 16]s^{-1}$ ) contours are shown here for case 5 which has  $\theta_{T,o} = 0.22^\circ$ ,  $\theta_{C,o} = 11.18^\circ$ , and  $St = 0.371$ . Positive spanwise vorticity is shown in red and negative in blue: (A) The trailing edge motion profile where the solid curve represents the trailing edge amplitude and the dashed curve represents the trailing edge velocity. (B)  $t/T = 0.40$ . (C)  $t/T = 0.52$ . (D)  $t/T = 0.64$ . (E)  $t/T = 0.76$ . (F)  $t/T = 0.84$ . (G)  $t/T = 1.00$ .

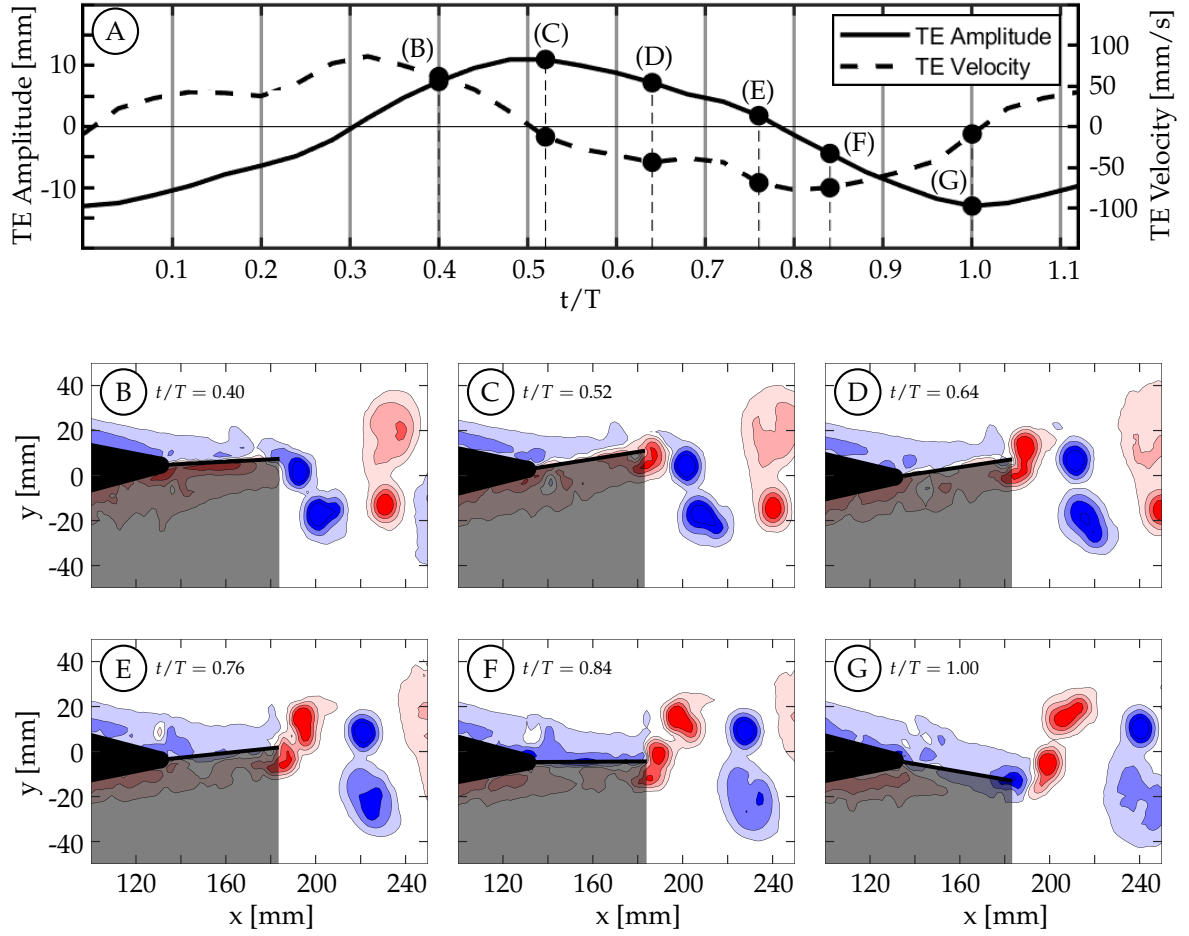

**Figure S6.** (Case 6: SG2, KG2) Spanwise vorticity ( $\omega_z = \pm[1, 4, 9, 16]s^{-1}$ ) contours are shown here for case 6 which has  $\theta_{T,\rho} = 2.06^\circ$ ,  $\theta_{C,\rho} = 9.12^\circ$ , and  $St = 0.403$ . Positive spanwise vorticity is shown in red and negative in blue: (A) The trailing edge motion profile where the solid curve represents the trailing edge amplitude and the dashed curve represents the trailing edge velocity. (B)  $t/T = 0.40$ . (C)  $t/T = 0.52$ . (D)  $t/T = 0.64$ . (E)  $t/T = 0.76$ . (F)  $t/T = 0.84$ . (G)  $t/T = 1.00$ .

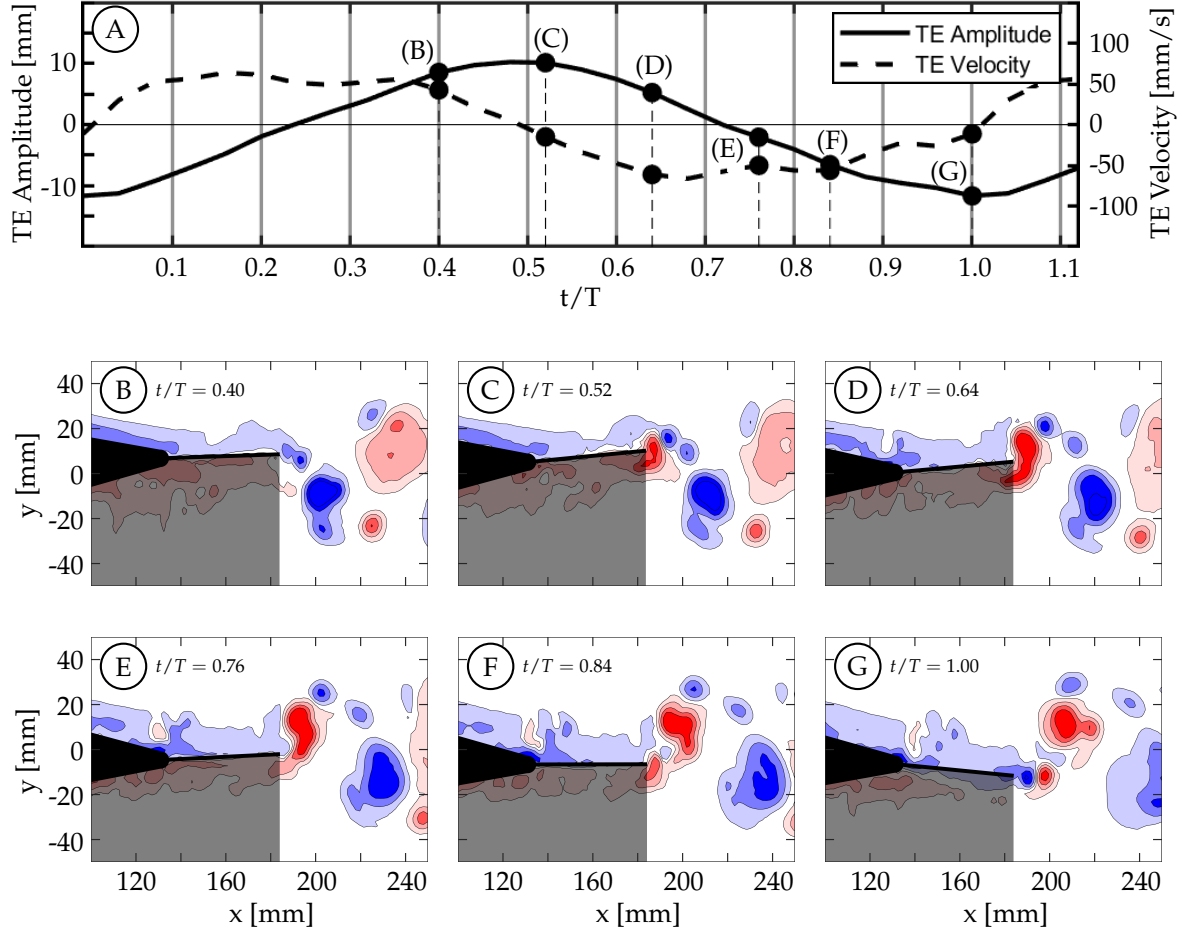

**Figure S7.** (Case 7: SG2, KG3) Spanwise vorticity ( $\omega_z = \pm[1, 4, 9, 16]s^{-1}$ ) contours are shown here for case 7 which has  $\theta_{T,0} = 3.04^\circ$ ,  $\theta_{C,0} = 4.91^\circ$ , and  $St = 0.368$ . Positive spanwise vorticity is shown in red and negative in blue: (A) The trailing edge motion profile where the solid curve represents the trailing edge amplitude and the dashed curve represents the trailing edge velocity. (B)  $t/T = 0.40$ . (C)  $t/T = 0.52$ . (D)  $t/T = 0.64$ . (E)  $t/T = 0.76$ . (F)  $t/T = 0.84$ . (G)  $t/T = 1.00$ .

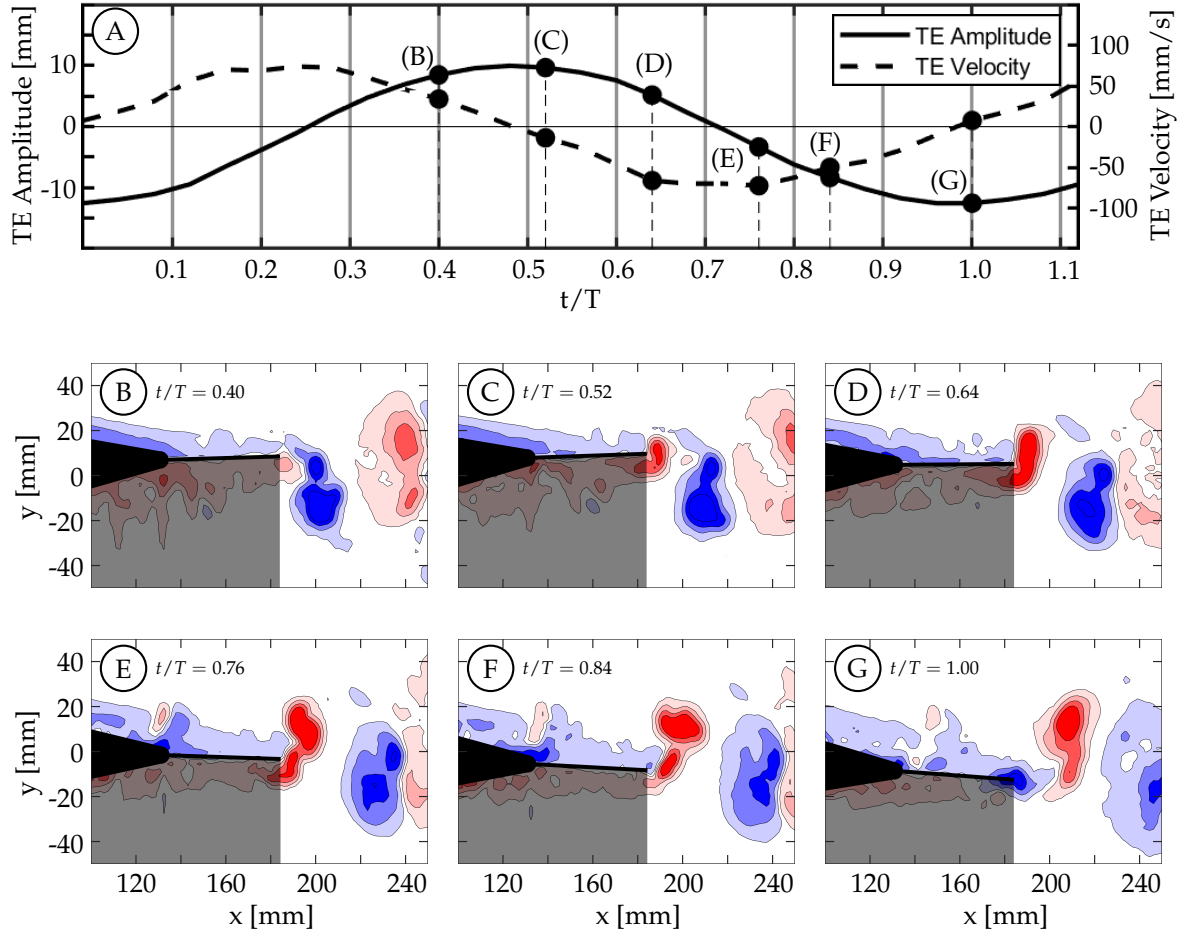

**Figure S8.** (Case 8: SG2, KG4) Spanwise vorticity ( $\omega_z = \pm[1, 4, 9, 16]s^{-1}$ ) contours are shown here for case 8 which has  $\theta_{T,\rho} = 3.63^\circ$ ,  $\theta_{C,\rho} = 0.68^\circ$ , and  $St = 0.378$ . Positive spanwise vorticity is shown in red and negative in blue: (A) The trailing edge motion profile where the solid curve represents the trailing edge amplitude and the dashed curve represents the trailing edge velocity. (B)  $t/T = 0.40$ . (C)  $t/T = 0.52$ . (D)  $t/T = 0.64$ . (E)  $t/T = 0.76$ . (F)  $t/T = 0.84$ . (G)  $t/T = 1.00$ .

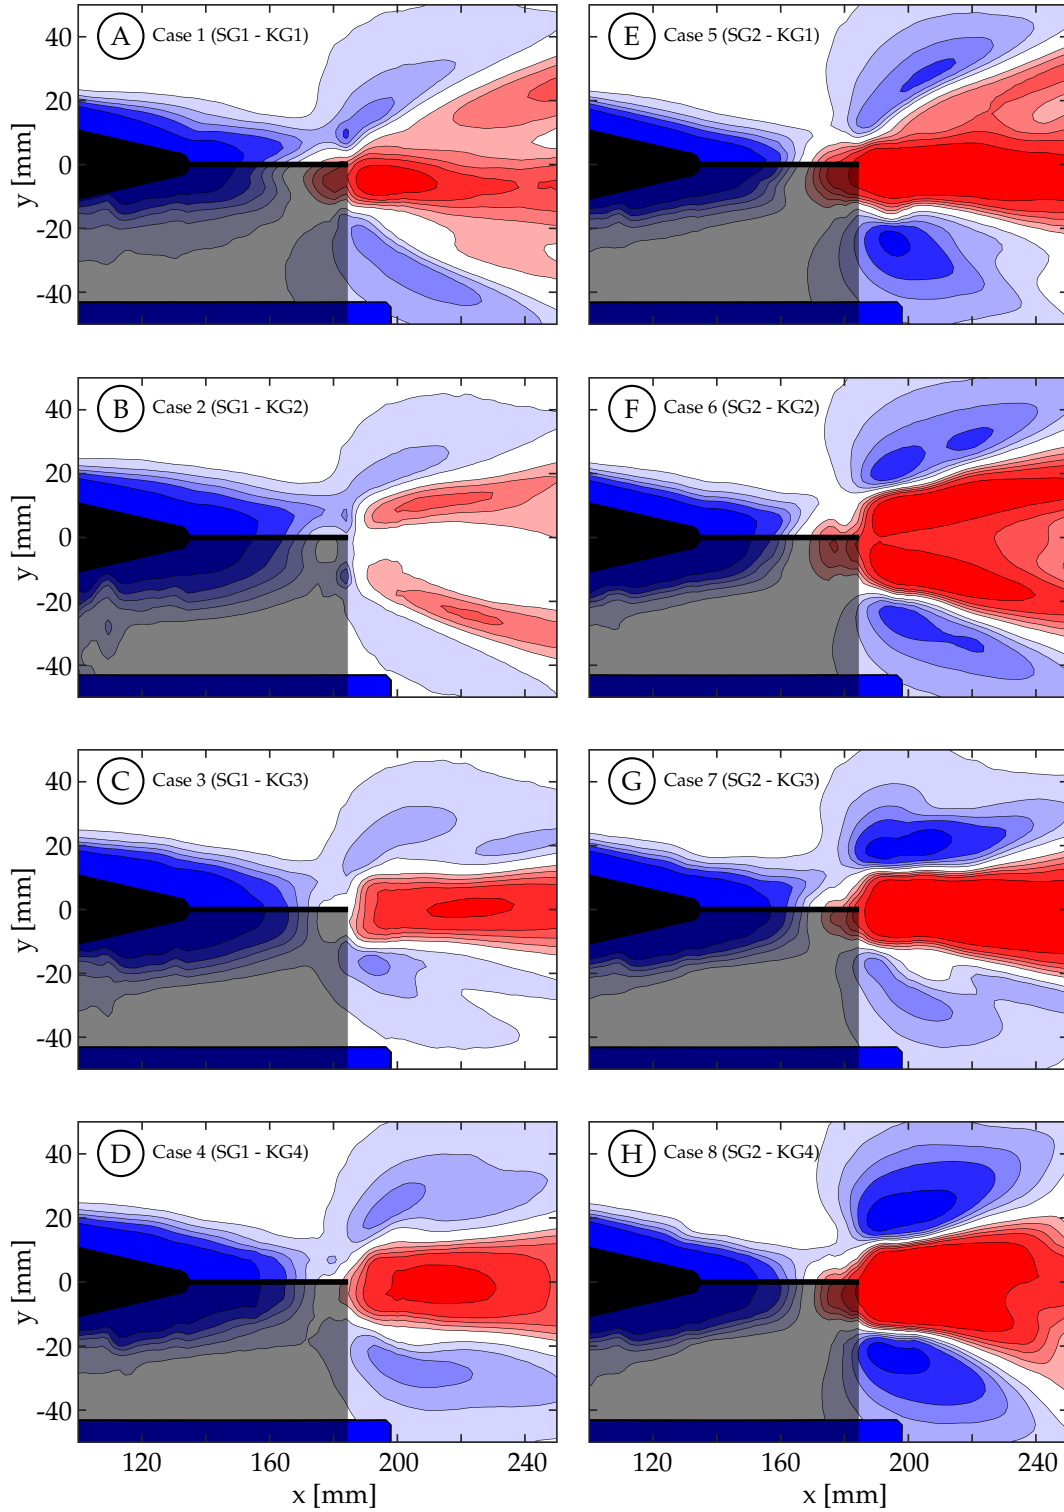

**Figure S9.** Time averaged x-direction velocity ( $U/U_\infty - 1 = \pm[0.05, 0.10, 0.15, 0.20, 0.30]$ ) contours are shown here for cases 1 through 8 where excess velocity is red and velocity deficit is blue: (A) Case 1 - SG1 and KG1. (B) Case 2 - SG1 and KG2. (C) Case 3 - SG1 and KG3. (D) Case 4 - SG1 and KG4. (E) Case 5 - SG2 and KG1. (F) Case 6 - SG2 and KG2. (G) Case 7 - SG2 and KG3. (H) Case 8 - SG2 and KG4.
